# Supplementary material for: CANTO-RT: One of the Largest Prospective Multicenter Cohort of Early Breast Cancer Patients Treated with Radiotherapy including Full DICOM RT Data
Source: MDPI journal article supplement (doi:10.3390/cancers15030751), 2023-01-25
Supplement: s1 [file s1]

**Table S1:** List of main variable.

| Variable name               | Variable Label                                                                                                          | assigned variable names | Variable Format |
|-----------------------------|-------------------------------------------------------------------------------------------------------------------------|-------------------------|-----------------|
| Age at enrolment            | Age in year                                                                                                             | Age_diag                | numeric         |
| Smoking status at diagnosis | 1=Current; 2=Former ; 3=Never                                                                                           | TABAC_BI                | character       |
| Diabetes                    | 0=No; 1=Yes;                                                                                                            | Diabete_atcd            | character       |
| Hypertension                | 0=No; 1=Yes;                                                                                                            | HTA_atcd                | character       |
| Dyslipidemia                | 0=No; 1=Yes;                                                                                                            | dyslipidemie_atcd       | character       |
| BMI                         | kg/m2                                                                                                                   | IMC_BI                  | numeric         |
| Tumour size (pT)            | 0=T0; 1=T1; 2=T2; 3=T3                                                                                                  | PTGlobal                | character       |
| Nodal status (pN)           | 0=0; 1=1; 3=2; 4=3                                                                                                      | PN_M0                   | character       |
| Tumour histology            | 1=Infiltrating Ductal; 2=Lobular; 3=Others (including mixed).                                                           | Tumour_histo            | character       |
| Hormone Receptors positive  | 0=Negative; 1=Positive;                                                                                                 | HR                      | character       |
| Estrogen receptors          | 0=Negative; 1=Positive;                                                                                                 | RE                      | character       |
| Progesterone receptors      | 0=Negative; 1=Positive;                                                                                                 | RP                      | character       |
| HER2                        | 0=Negative; 1=Positive;                                                                                                 | HER2                    | character       |
| SBR Grading                 | 1=I; 2=II; 3=III.                                                                                                       | GRADE                   | character       |
| Ki67                        | 0=No; 1=Yes;                                                                                                            | Ki67                    | character       |
| Percent of Ki67             | %                                                                                                                       | POURCKI67               | numeric         |
| Type of chemotherapy        | 0=No chemotherapy; 1=Neo-adjuvant chemotherapy; 2=Adjuvant chemotherapy; 3=Peri-adjuvant chemotherapy (neo + adjuvant); | CHIMIOTYP               | character       |
| Hormonal therapy            | 0=No; 1=Yes;                                                                                                            | Tumour_histo            | character       |
| Trastuzumab treatment       | 0=No; 1=Yes;                                                                                                            | Base_herceptin          | character       |
| Lumpectomy                  | 0=No; 1=Yes;                                                                                                            | TUMOR_                  | character       |
| Total mastectomy            | 0=No; 1=Yes;                                                                                                            | MASTR_                  | character       |
| Sentinel node               | 0=No; 1=Yes;                                                                                                            | GANGLS_                 | character       |
| Axillary dissection         | 0=No; 1=Yes;                                                                                                            | CURAGE_                 | character       |

|                           |                                                                                                                             |                           |           |
|---------------------------|-----------------------------------------------------------------------------------------------------------------------------|---------------------------|-----------|
| Radiation therapy         | 0=No; 1=Yes;                                                                                                                | RADIO_                    | character |
| Patients with boost       | 0=No; 1=Yes;                                                                                                                | Boost_                    | character |
| Lymph node levels treated | 0=None; 1=Yes;                                                                                                              | Aires_GG_                 | character |
| Level 1                   | 0=None; 1=Yes;                                                                                                              | I_all_                    | character |
| Level 2                   | 0=None; 1=Yes;                                                                                                              | II_all_                   | character |
| Level 3                   | 0=None; 1=Yes;                                                                                                              | III_all_                  | character |
| Level 4                   | 0=None; 1=Yes;                                                                                                              | IV_all_                   | character |
| Internal mammary chain    | 0=None; 1=Yes;                                                                                                              | CMI_all_                  | character |
| Irradiation techniques    | 0=3D; 1=IMRT                                                                                                                | Technique_                | character |
| Fractionation regimens    | 0=Normofractionation 25-fractions; 1=Hypofractionation 15-16 fractions; 2=Hypofractionation and Partial breast irradiation; | Fractionnement__NF0__HF1_ | character |
